# Supplementary material for: Tailored design of renewable copolymers based on poly(1,4-butylene 2,5-furandicarboxylate) and poly(ethylene glycol) with refined thermal properties
Source: Royal Society of Chemistry journal article supplement (doi:10.1039/c7py01627a), 2017-12-26
Supplement: c7py01627a1.pdf [file c7py01627a1.pdf]

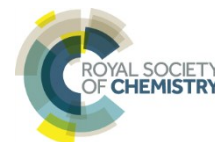

Polym. Chem.

PAPER

## Electronic Supplementary Information for

Received 00th January 20xx,  
Accepted 00th January 20xx

DOI: 10.1039/x0xx00000x

[www.rsc.org/](http://www.rsc.org/)

## Tailor design of renewable copolymers based on poly(1,4-butylene 2,5-furandicarboxylate) and poly(ethylene glycol) with refined thermal properties

A. F. Sousa,<sup>\*,a,b</sup> N. Guigo,<sup>c</sup> M. Pożycka,<sup>a</sup> M. Delgado,<sup>‡a</sup> J. Soares,<sup>‡a</sup> P. V. Mendonça,<sup>b</sup> J. F. J. Coelho,<sup>b</sup> N. Sbirrazzuoli,<sup>c</sup> and A. J. D. Silvestre<sup>a</sup>

### Table of contents

|                                                             |           |
|-------------------------------------------------------------|-----------|
| <b>1 Structural characterisation of the PBF/PEGFs</b> ..... | <b>S2</b> |
| 1.1 FTIR spectra .....                                      | S2        |
| 1.2 NMR analyses .....                                      | S3        |
| <b>2 Thermal behaviour of PBF/PEGF</b> .....                | <b>S4</b> |
| 2.1 TGA traces .....                                        | S4        |
| 2.2 DMTA trace.....                                         | S5        |
| <b>3 XRD pattern</b> .....                                  | <b>S5</b> |

<sup>a</sup> CICECO- Aveiro Institute of Materials and Department of Chemistry, University of Aveiro, 3810-193 Aveiro, Portugal.

<sup>b</sup> CEMMPRE, Department of Chemical Engineering, University of Coimbra, 3030-790 Coimbra, Portugal.

<sup>c</sup> Université Nice Sophia Antipolis, CNRS, LPMR, UMR, 7336, 06100, Nice, France.

<sup>‡</sup> These authors contributed equally.

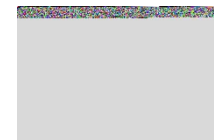

## 1 Structural characterisation of the PBF/PEGFs

### 1.1 FTIR spectra

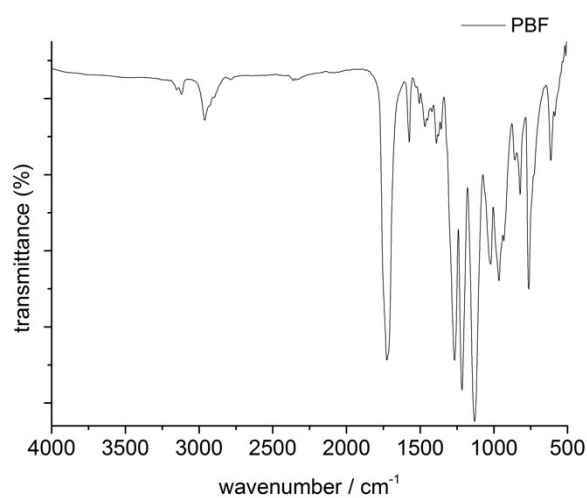

Fig. S1 FTIR spectrum of PBF homopolymer.

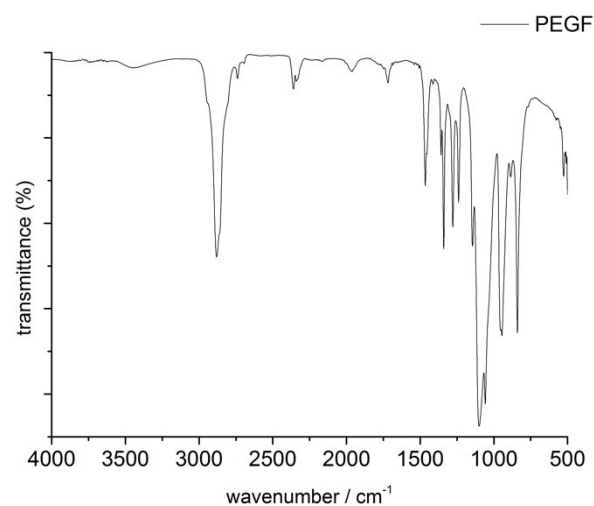

Fig. S2 FTIR spectrum of PEGF homopolymer.

## 1.2 NMR spectra

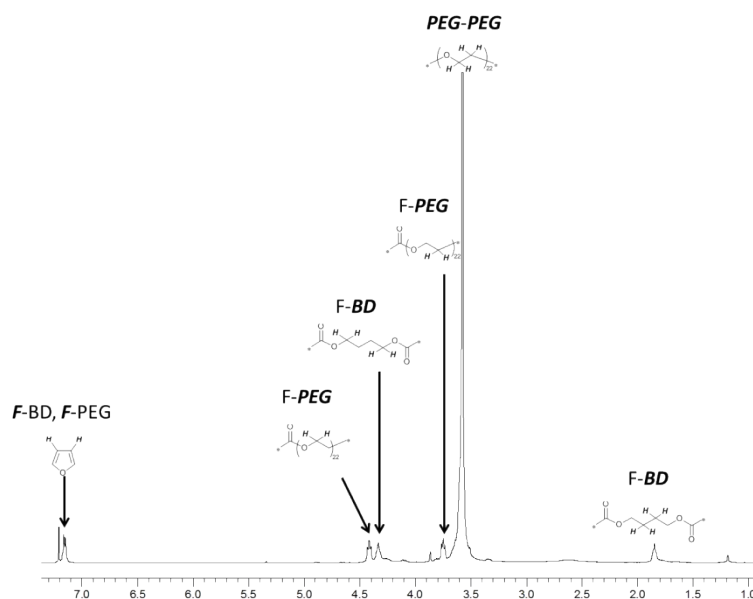

Fig. S3  $^1\text{H}$  NMR spectra of PBF/PEGF2 in deuterated chloroform.

Table S1 Assignments of the main  $^{13}\text{C}$  NMR resonances ( $\text{CDCl}_3$ ) of PBF/PEGF copolymers and of PBF and PEGF homopolymers.

| assign. <sup>a</sup>                       | $\delta$ / ppm   |                |       |       |       |                   |
|--------------------------------------------|------------------|----------------|-------|-------|-------|-------------------|
|                                            | PBF <sup>b</sup> | 1 <sup>b</sup> | 2     | 3     | 4     | PEGF <sup>c</sup> |
| <b>C=O;</b>                                | 158.0            | 160.5          | 158.0 | 157.9 | 157.9 | 161.0             |
| <b>F-BD, F-PEG</b>                         |                  |                |       |       |       |                   |
| <b>C2, C5;</b>                             | 146.8            | 146.6          | 146.8 | 146.7 | 146.7 | 154.7             |
| <b>F-BD, F-PEG</b>                         |                  |                |       |       |       |                   |
| <b>C3, C4;</b>                             | 118.5            | 119.7          | 118.5 | 118.6 | 118.6 | 119.0             |
| <b>F-BD, F-PEG</b>                         |                  |                |       |       |       |                   |
| <b>OCH<sub>2</sub>;</b>                    | -                | 69.5           | 70.5  | 70.6  | 70.6  | 70.56             |
| <b>PEG-PEG</b>                             |                  |                |       |       |       |                   |
| <b>C(O)OCH<sub>2</sub>CH<sub>2</sub>O;</b> | -                | 68.6           | 68.9  | 68.9  | 68.9  | 68.8              |
| <b>F-PEG</b>                               |                  |                |       |       |       |                   |
| <b>C(O)OCH<sub>2</sub>;</b>                | 64.9             | 66.7           | 64.9  | 64.9  | n.d.  | -                 |
| <b>F-BD</b>                                |                  |                |       |       |       |                   |
| <b>C(O)OCH<sub>2</sub>;</b>                | -                | 66.7           | 64.5  | 64.5  | 64.5  | 63.0              |
| <b>F-PEG</b>                               |                  |                |       |       |       |                   |
| <b>C(O)OCH<sub>2</sub>CH<sub>2</sub>;</b>  | 25.3             | 24.4           | 25.3  | 25.2  | n.d.  | -                 |
| <b>F-BD</b>                                |                  |                |       |       |       |                   |

<sup>a</sup>  $^{13}\text{C}$  NMR resonances assignment and corresponding group and diad (two adjacent structural units F-BD, F-PEG and/or PEG-PEG). F, BD and PEG stand for 2,5-furandicarboxylate, 1,4-butanediyl and PEG moieties, respectively. <sup>b</sup>  $^{13}\text{C}$  NMR spectra in deuterated TFA. <sup>c</sup>  $^{13}\text{C}$  NMR spectra were recorded in deuterated chloroform.

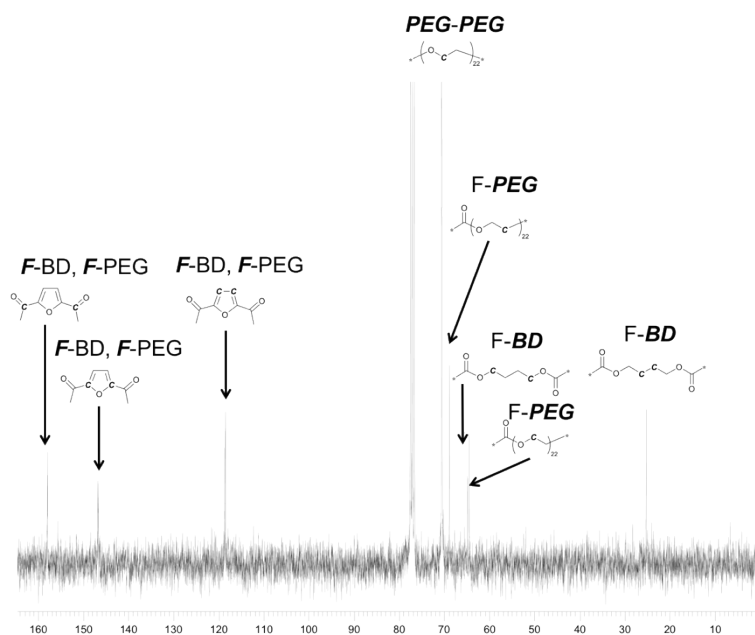

Fig. S4  $^{13}\text{C}$  NMR spectra of PBF/PEGF2 in deuterated chloroform.

## 2 Thermal behaviour of PBF/PEGFs

### 2.1 TGA traces

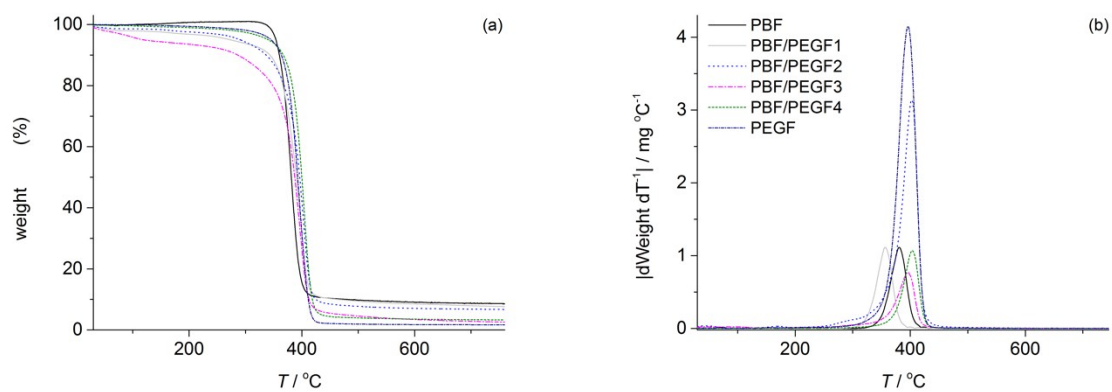

Fig. S5 Thermogravimetric curves of the PBF/PEGFs, PBF and PEGF: (a) TG and (b) DTG.

## 2.2 DMTA trace

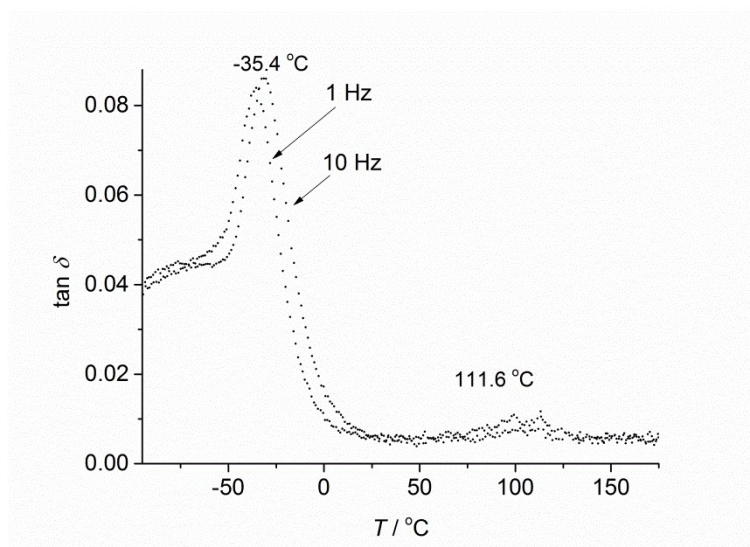

Fig. S6 DMTA traces of PBF/PEGF1 at 1 and 10 Hz.

## 3 XRD pattern

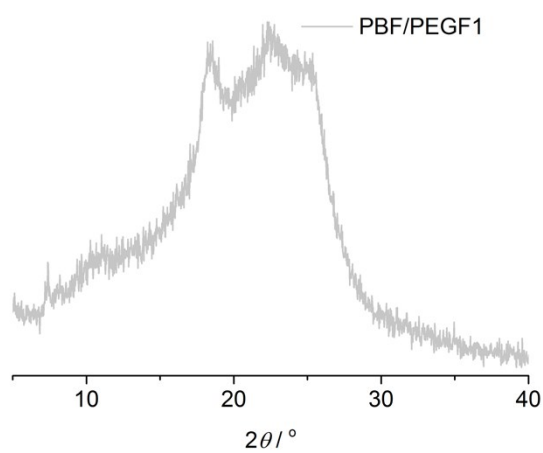

Fig. S7 XRD pattern of PBF/PEGF1.
